# Supplementary material for: Climate Change Impacts on the Potential Distribution Pattern of Osphya (Coleoptera: Melandryidae), an Old but Small Beetle Group Distributed in the Northern Hemisphere
Source: MDPI journal article supplement (doi:10.3390/insects14050476), 2023-05-18
Supplement: s1 [file s1]

# SUPPLEMENTARY FILES

**Table S1.** The occurrence records of *Osphya* in constructing model

| Species                                       | Distribution    | Longitude | Latitude | Source |
|-----------------------------------------------|-----------------|-----------|----------|--------|
| <i>Osphya bipunctata</i><br>(Fabricius, 1775) | Austria         | 16.2      | 48.2     | GBIF   |
|                                               | Belgium         | 4.32827   | 50.85078 | —      |
|                                               | Bosnia          | 17.68172  | 44.02904 | —      |
|                                               | Bulgaria        | 23.32166  | 42.69541 | —      |
|                                               | Croatia         | 15.98554  | 45.8331  | —      |
|                                               | Czech Republic  | 14.4513   | 50.07914 | —      |
|                                               | Denmark         | 9.43171   | 56.11191 | —      |
|                                               | France          | 2.1       | 49.9     | —      |
|                                               | Great Britain   | -2.4      | 51.3     | —      |
|                                               | Germany         | 8         | 50       | —      |
|                                               | Greece          | 22.93281  | 40.65901 | —      |
|                                               | Hungary         | 20.5      | 48.1     | —      |
|                                               | Italy           | 10.5      | 46.7     | —      |
|                                               | Latvia          | 24.10318  | 56.95007 | —      |
|                                               | The Netherlands | 4.31086   | 52.06358 | —      |
|                                               | Norway          | 10        | 59.1     | —      |
|                                               | Poland          | 21.08497  | 52.21973 | —      |

---

|             |          |          |   |
|-------------|----------|----------|---|
| Romania     | 26.15526 | 44.41245 | — |
| Slovakia    | 21.27958 | 48.72323 | — |
| Sweden      | 17.6     | 59.5     | — |
| Switzerland | 7.3      | 47.4     | — |
| Ukraine     | 30.53517 | 50.45227 | — |
| Austria     | 16.2     | 48.2     | — |
| Germany     | 7.1      | 49.2     | — |
| Germany     | 9.7      | 51.9     | — |
| Sweden      | 17.6     | 59.5     | — |
| Sweden      | 16.2     | 57       | — |
| Serbia      | 22.3     | 42.5     | — |
| Sweden      | 16       | 57       | — |
| Germany     | 7.5      | 49.8     | — |
| Germany     | 9.9      | 51.6     | — |
| Germany     | 8.4      | 49.2     | — |
| Germany     | 10.3     | 50.2     | — |
| Sweden      | 15.4     | 56.3     | — |
| France      | 7.6      | 48.2     | — |
| Sweden      | 14.5     | 56.3     | — |
| France      | 2.9      | 42.5     | — |
| Norway      | 10.1     | 59.2     | — |

---

---

|                                          |      |      |   |
|------------------------------------------|------|------|---|
| France                                   | 2.9  | 49.4 | — |
| UK of Great Britain and Northern Ireland | 1.3  | 52.4 | — |
| UK of Great Britain and Northern Ireland | -2.2 | 52.1 | — |
| France                                   | 6.1  | 47   | — |
| Sweden                                   | 16.6 | 57.7 | — |
| France                                   | 2.4  | 49.8 | — |
| Germany                                  | 7.2  | 50.6 | — |
| France                                   | 3.1  | 42.5 | — |
| Germany                                  | 8    | 49.3 | — |
| Germany                                  | 6.2  | 50   | — |
| France                                   | 5.4  | 48.5 | — |
| Germany                                  | 11.1 | 51.3 | — |
| Germany                                  | 7.2  | 50.5 | — |
| Germany                                  | 6.5  | 50.6 | — |
| France                                   | 5.6  | 48.8 | — |
| Germany                                  | 11.3 | 48.7 | — |
| Sweden                                   | 15.2 | 56.2 | — |
| France                                   | 5.4  | 48.3 | — |
| France                                   | 4.8  | 47.8 | — |
| France                                   | 5.8  | 45.8 | — |
| France                                   | 5.8  | 44.1 | — |

---

---

|                                          |      |      |   |
|------------------------------------------|------|------|---|
| France                                   | 5.8  | 44.2 | — |
| Spain                                    | 2.5  | 41.8 | — |
| France                                   | 6.3  | 46.3 | — |
| France                                   | 5.9  | 46.1 | — |
| Norway                                   | 9.9  | 59.2 | — |
| France                                   | 7.5  | 48.1 | — |
| France                                   | 7.5  | 48   | — |
| France                                   | 5.5  | 48.6 | — |
| Germany                                  | 13.6 | 52.9 | — |
| Germany                                  | 13.9 | 53.1 | — |
| Germany                                  | 13.8 | 52.9 | — |
| Germany                                  | 13.9 | 53.2 | — |
| Germany                                  | 13.8 | 53   | — |
| UK of Great Britain and Northern Ireland | 0    | 52.1 | — |
| France                                   | 6.4  | 44.1 | — |
| France                                   | 5.9  | 44.3 | — |
| UK of Great Britain and Northern Ireland | -2.3 | 51.4 | — |
| Sweden                                   | 16.1 | 56.9 | — |
| UK of Great Britain and Northern Ireland | -0.2 | 52.4 | — |
| Sweden                                   | 15.7 | 57.6 | — |
| Sweden                                   | 14.5 | 56.2 | — |

---

---

|                                          |      |      |   |
|------------------------------------------|------|------|---|
| France                                   | 5.9  | 44.4 | — |
| UK of Great Britain and Northern Ireland | 0    | 52.2 | — |
| Germany                                  | 9.3  | 51.4 | — |
| Germany                                  | 9.1  | 51.1 | — |
| France                                   | 2.2  | 42.8 | — |
| France                                   | 3.8  | 50.2 | — |
| UK of Great Britain and Northern Ireland | -2   | 51.8 | — |
| UK of Great Britain and Northern Ireland | -0.1 | 52   | — |
| Germany                                  | 9    | 51.2 | — |
| France                                   | 0.6  | 42.8 | — |
| UK of Great Britain and Northern Ireland | -2.3 | 51.6 | — |
| UK of Great Britain and Northern Ireland | -0.3 | 52.6 | — |
| UK of Great Britain and Northern Ireland | 0.5  | 51.4 | — |
| UK of Great Britain and Northern Ireland | -0.5 | 52.6 | — |
| Austria                                  | 16.8 | 48   | — |
| UK of Great Britain and Northern Ireland | 0.3  | 51.6 | — |
| Norway                                   | 10.6 | 59.7 | — |
| Austria                                  | 16.6 | 47.9 | — |
| Sweden                                   | 16.4 | 56.9 | — |
| UK of Great Britain and Northern Ireland | -0.8 | 52   | — |
| UK of Great Britain and Northern Ireland | -1.5 | 51.7 | — |

---

---

|                                          |         |         |            |
|------------------------------------------|---------|---------|------------|
| Austria                                  | 16.7    | 48.1    | —          |
| Austria                                  | 16.6    | 47.9    | —          |
| UK of Great Britain and Northern Ireland | -0.3    | 52.3    | —          |
| UK of Great Britain and Northern Ireland | -1      | 51.7    | —          |
| UK of Great Britain and Northern Ireland | 0.1     | 51.6    | —          |
| France                                   | -0.6    | 42.9    | —          |
| Switzerland                              | 7.5     | 46.3    | —          |
| Austria                                  | 14.3    | 47.9    | —          |
| Austria                                  | 16.2    | 48.1    | —          |
| Austria                                  | 16.2    | 48      | —          |
| Austria                                  | 16.4    | 48.2    | —          |
| Germany                                  | 10.6    | 50.4    | —          |
| France                                   | 2.2     | 42.9    | —          |
| France                                   | -0.6    | 43      | —          |
| Slovakia                                 | 18      | 48.9    | —          |
| Russia, Chuvash Republic                 | 46.6003 | 54.9858 | Mazurov et |
| Russia, Chuvash Republic                 | 47.9125 | 55.0222 | al. (2022) |
| Russia, Chuvash Republic                 | 46.7749 | 55.0091 | —          |
| Russia, Chuvash Republic                 | 46.7203 | 54.9775 | —          |
| Russia, Saratov Oblast                   | 48.0523 | 52.4849 | —          |
| Russia, Lipetsk Oblast                   | 38.8942 | 52.5554 | —          |

---

|                                                 |                                      |         |         |            |
|-------------------------------------------------|--------------------------------------|---------|---------|------------|
| <i>Osphya aeneipennis</i><br>Kriechbaumer, 1848 | Russia, Lipetsk Oblast               | 40.0098 | 52.9792 | Egorov et  |
|                                                 | Ukraine, Donetsk Donetsk Oblast      | 37.7029 | 47.9338 | al. (2022) |
|                                                 | Russia, Republic of Moldova          | 43.1522 | 54.7275 | —          |
|                                                 | Russia, Republic of Moldova          | 43.4371 | 54.7874 | —          |
|                                                 | Ukraine, Donetsk Donetsk Oblast      | 37.7029 | 47.9338 | —          |
|                                                 | Russia, Volgograd Oblast             | 45.6567 | 50.5724 | —          |
|                                                 | Russia, Republic of Tatarstan        | 50.5244 | 55.6134 | —          |
|                                                 | Russia, Republic of ufabashkortostan | 56.1116 | 54.5997 | —          |
|                                                 | Switzerland                          | 7.9     | 46.3    | GBIF       |
|                                                 | Switzerland                          | 7.1     | 46.2    | —          |
|                                                 | France                               | 6.2     | 44.1    | —          |
|                                                 | France                               | 6.6     | 44.4    | —          |
|                                                 | France                               | 6.3     | 43.7    | —          |
|                                                 | France                               | 6.1     | 44.6    | —          |
|                                                 | Switzerland                          | 9.4     | 46.9    | —          |
|                                                 | Switzerland                          | 9.2     | 46.3    | —          |
|                                                 | France                               | 5.8     | 43.3    | —          |
|                                                 | France                               | 5.7     | 45.2    | —          |
|                                                 | France                               | 5.8     | 43.4    | —          |
|                                                 | France                               | 6.2     | 44.4    | —          |
|                                                 | France                               | 2.4     | 42.6    | —          |

---

|             |      |      |   |
|-------------|------|------|---|
| Switzerland | 7.7  | 46.3 | — |
| France      | 5.5  | 44.4 | — |
| France      | 6.4  | 44   | — |
| France      | 5.6  | 44.9 | — |
| France      | 6.6  | 43.9 | — |
| France      | 6.7  | 44   | — |
| France      | 6.3  | 43.8 | — |
| France      | 5.9  | 43.2 | — |
| France      | 6.3  | 44.1 | — |
| France      | 6.8  | 44.6 | — |
| Switzerland | 7.3  | 46.3 | — |
| France      | 5.6  | 43.9 | — |
| France      | 2.5  | 42.5 | — |
| France      | 6.6  | 44.3 | — |
| France      | 6.8  | 44.2 | — |
| Switzerland | 8.1  | 46.3 | — |
| Switzerland | 7.1  | 46.1 | — |
| Italy       | 11.3 | 46.4 | — |
| Switzerland | 7.9  | 46.3 | — |
| Switzerland | 10.3 | 46.8 | — |
| Switzerland | 9.3  | 46.8 | — |

---



|                                                 |                                                 |           |          |                                     |
|-------------------------------------------------|-------------------------------------------------|-----------|----------|-------------------------------------|
| <b><i>Osphya vandalitiae</i> (Kraatz, 1868)</b> | Italy                                           | 11.3      | 46.5     | —                                   |
|                                                 | Switzerland                                     | 9.5       | 46.8     | —                                   |
|                                                 | Switzerland                                     | 7.1       | 46       | —                                   |
|                                                 | Italy                                           | 11.2      | 46.3     | —                                   |
|                                                 | Italy                                           | 11.7      | 46.7     | —                                   |
|                                                 | Portugal: Faro, Sao Bras de Alportel, Machados. | -7.89209  | 37.13222 | Recalde<br>Irurzun et al.<br>(2017) |
|                                                 | Portugal: Castelhana-alloibre river.            | -9.18825  | 38.71516 | —                                   |
|                                                 | Portugal: Bordeira 1.6 Km NE.                   | -8.86087  | 37.19622 | —                                   |
|                                                 | Portugal: Barranco do Velho (0.5Km S).          | -7.93696  | 37.23770 | —                                   |
|                                                 | Portugal: Beja, 15 km of Serpa, Limas river     | -7.59764  | 37.94467 | —                                   |
|                                                 | Portugal: Odemira (3.7km NE).                   | -8.63665  | 37.59729 | —                                   |
|                                                 | Spain: Granada, Guejar Sierra, Vda. LaEstrella. | -3.40457  | 37.14152 | —                                   |
|                                                 | Spain: Cadiz, San Roque, at a pond.             | -5.38575  | 36.21083 | —                                   |
|                                                 | Spain: Malaga, Gaucin, from Manilva to Gaucin.  | -5.31267  | 36.51749 | —                                   |
|                                                 | Spain: the banks of the Genal river             | -5.199563 | 36.60344 | —                                   |
|                                                 | Portugal                                        | -7.6      | 37.3     | GBIF                                |
| <b><i>Osphya lehnertae</i> Konvička, 2014</b>   | Greece: Peloponnese, Menalo Mts, 2.2 km         | 22.171074 | 37.64855 | Konvička                            |

|                                                   |                                                              |           |          |                           |
|---------------------------------------------------|--------------------------------------------------------------|-----------|----------|---------------------------|
|                                                   | south southwest of Vytina village.                           |           |          | (2014)                    |
|                                                   | Greece: Peloponnese, Menalo Mts, Vytina.                     | 22.171074 | 37.64855 | —                         |
|                                                   | Greece: Peloponnese, Lakonia, Karyes env.                    | 22.44082  | 37.26141 | —                         |
|                                                   | Greece: Peloponnese, Kalavryta town.                         | 22.14028  | 37.96050 | —                         |
|                                                   | Greece: Graecia (Patra), 5km Nkalavryta.                     | 21.74833  | 38.23016 | —                         |
| <b><i>Osphya brusteli</i> Konvička, 2016</b>      | Greece: Western Macedonia Province, Florina env.             | 21.42324  | 40.80135 | Konvička (2016)           |
|                                                   | Greece: Véro Mts, 2.5 km east southeast of Pisoderi village. | 21.268333 | 40.77389 | —                         |
|                                                   | Greece: Jugoslaviamer, Jakupica mountains, Macedonia centr.  | 21.40842  | 41.70836 | —                         |
| <b><i>Osphya cylindromorpha</i> Abeille, 1896</b> | Syria                                                        | 36.19993  | 35.65025 | Nikitsky & Pollock (2008) |
|                                                   | Turkey                                                       | 36.12423  | 35.95051 | —                         |
| <b><i>Osphya griseofasciata</i> Pic, 1921</b>     | Turkey                                                       | 36.12423  | 35.95051 | Pic (1921b)               |
| <b><i>Osphya uniformis</i> Pic, 1921</b>          | Turkey                                                       | 36.12423  | 35.95051 | —                         |
| <b><i>Osphya aerate</i> Seidlitz, 1898</b>        | Azerbaijan                                                   | 48.31185  | 38.69876 | Nikitsky & Pollock (2008) |

|                                           |                                   |           |          |                    |
|-------------------------------------------|-----------------------------------|-----------|----------|--------------------|
|                                           | Armenia                           | 46.41334  | 39.23411 | —                  |
|                                           | Iran                              | 48.24487  | 38.61941 | —                  |
| <i>Osphya formosana</i> Pic, 1927         | China: Taiwan                     | 121.29578 | 24.99511 | Pic<br>(1927a)     |
| <i>Osphya trilineata</i> Pic, 1910        | China: Taiwan                     | 121.29578 | 24.99511 | Pic<br>(1910)      |
| <i>Osphya orientalis</i> (Lewis, 1895)    | Japan, Miyanoshita                | 139.06054 | 35.23929 | Lewis<br>(1895)    |
|                                           | Japan, Nikko                      | 139.54738 | 36.79846 | —                  |
| <i>Osphya albofasciata</i> Champion, 1916 | India: Assam, Patkai Mts.         | 95.99960  | 27.00004 | Champion<br>(1916) |
| <i>Osphya harmandi</i> Pic, 1926          | India: Sikkim                     | 88.48946  | 27.21889 | Pic (1926)         |
|                                           | India: Darjeeling District        | 88.27189  | 27.02923 | —                  |
| <i>Osphya dissimilis</i> Champion, 1922   | India: Uttarakhand, Uttar pradesh | 79.06097  | 30.14047 | Champion<br>(1922) |
| <i>Osphya nigriventris</i> Champion, 1920 | India: Uttarakhand, Uttar pradesh | 79.06097  | 30.14047 | Champion<br>(1920) |
| <i>Osphya nigroapicalis</i> Pic, 1921     | India.                            | 88.27189  | 27.02923 | Pic (1921a)        |
| <i>Osphya nilgirica</i> Champion, 1916    | India: Nilgiri Hills              | 76.76198  | 11.37447 | Champion<br>(1916) |
| <i>Osphya rufa</i> Pic, 1927b             | Vietnam: Chapa                    | 103.96834 | 22.50462 | Pic (1927b)        |

|                                            |                                                              |            |          |                    |
|--------------------------------------------|--------------------------------------------------------------|------------|----------|--------------------|
| <b><i>Osphya superba</i> Pic, 1927</b>     | Vietnam: Chapa                                               | 103.96834  | 22.50462 | Pic (1927b)        |
| <b><i>Osphya melina</i> Champion, 1916</b> | Myanmar: Tenasserim, Victoria Point.                         | 98.55190   | 9.99258  | Champion<br>(1916) |
| <b><i>Osphya essigi</i> Van Dyke, 1928</b> | American, Morgan Hill, Santa Clara Co., Calif                | -121.64990 | 37.12581 | SBMNH              |
| <b><i>Osphya lutea</i> (Horn, 1879)</b>    | USA: Morgan Hill, Santa Clara Co, Calif.                     | -121.64990 | 37.12581 | —                  |
|                                            | USA: Newton.                                                 | -118.25111 | 34.04792 | —                  |
|                                            | USA: KernSequoia NF, Riverkern.                              | -118.43283 | 35.77752 | —                  |
|                                            | USA: Los Angeles, Pasadena.                                  | -118.14362 | 34.14781 | —                  |
|                                            | USA: Los Angeles, Pomona.                                    | -117.76312 | 34.05376 | —                  |
|                                            | USA: Los Angeles, Angeles NF, Crystal Lake Rd.               | -117.82884 | 34.32615 | —                  |
|                                            | USA: Los Angeles, Angeles NF, 4 Km W Lake Hughes.            | -118.55842 | 34.71113 | —                  |
|                                            | USA: Los Angeles, Angeles NF, LkHughes Rd.                   | -118.50583 | 34.64332 | —                  |
|                                            | USA: Los Angeles, Angeles NF, near Redbox, San Gabriel Mts.  | -118.10543 | 34.25754 | —                  |
|                                            | USA: Los Angeles, Angeles NF, San Dimas Experimental Forest. | -117.76983 | 34.16763 | —                  |
|                                            | USA: Los Angeles, Griffith Park, Griffith                    | -118.29972 | 34.13583 | —                  |

---

Park.

USA: Los Angeles, Malibu Ck. SP. -118.72153 34.09793 —

USA: Orange, 4 mi E Olive. -117.78142 33.83342 —

USA: Riverside, 1 Km S Bundy Cyn, nr. -117.25792 33.61534 —  
Menifee Valley.

USA: Riverside, Devore. -117.40064 34.21642 —

USA: Riverside, Strawberry Cyn Rt. -116.77072 33.70934 —

USA: Riverside, San Bernardino, NF, Indian -116.81733 33.80954 —  
Ck.

USA: San Bernardino, NF, 1.5 mi S Mt. -117.63943 34.24974 —

Baldy Village.

USA: San Bernardino, NF, 5 mi SE -117.23654 34.34234 —

Hesperia.

USA: San Bernardino, NF, Gobblers Knob. -117.58353 34.31163 —

USA: San Bernardino, NF, Lake Arrowhead. -116.98364 34.18901 —

USA: San Diego, Boulevard. -116.27283 32.66364 —

USA: San Diego, Pine Valley. -116.53423 32.82342 —

USA: San Diego, River, 7 mi E Lakeside. -116.80374 32.88323 —

USA: San Diego. -117.15643 32.71534 —

USA: Santa Barbara, Montecito, nr. San -119.55324 34.49524 —

Ysidro Ck.

---

|                                              |                                                                |            |          |   |
|----------------------------------------------|----------------------------------------------------------------|------------|----------|---|
|                                              | USA: Santa Barbara, Foothill Rd.                               | -119.74363 | 34.46384 | — |
|                                              | USA: Santa Barbara, San Jose Ck BM.                            | -119.70272 | 34.41684 | — |
|                                              | USA: Santa Barbara, Arroyo Hondo Preserve, 25mi.W Sta.Barbara. | -120.14074 | 34.47843 | — |
|                                              | USA: Santa Barbara, UC Sedgwick Reserve.                       | -120.03953 | 34.71324 | — |
|                                              | USA: Tulare, Three Rivers, Ash Mt.                             | -118.83153 | 36.49194 | — |
|                                              | USA: Ventura, Howard Creek.                                    | -119.21673 | 34.54152 | — |
|                                              | USA: Ventura, Ojai.                                            | -119.24192 | 34.44813 | — |
|                                              | USA: Ventura; Los Padres NF; Upper Sespe Ck.                   | -119.2863  | 34.59    | — |
| <b><i>Osphya varians</i> (LeConte, 1866)</b> | Canada (Ontario Quebec)                                        | -74.73034  | 45.04079 | — |
|                                              | United States of America                                       | -94.9      | 31.3     | — |
|                                              | United States of America                                       | -97.8      | 30.4     | — |
|                                              | United States of America                                       | -97.4      | 32.8     | — |
|                                              | United States of America                                       | -97.7      | 30.4     | — |
|                                              | United States of America                                       | -96.7      | 32.9     | — |
|                                              | United States of America                                       | -97.6      | 30.7     | — |
|                                              | United States of America                                       | -97        | 32.6     | — |
|                                              | United States of America                                       | -80.9      | 33.5     | — |
|                                              | United States of America                                       | -98.5      | 33.9     | — |

---

|                          |       |      |   |
|--------------------------|-------|------|---|
| United States of America | -97.4 | 35.2 | — |
| United States of America | -77.1 | 38.9 | — |
| United States of America | -89.5 | 43.1 | — |
| United States of America | -97.7 | 30.6 | — |
| United States of America | -97.8 | 30.2 | — |
| United States of America | -96.7 | 33   | — |
| United States of America | -97.5 | 30.3 | — |
| United States of America | -97.2 | 32.8 | — |
| United States of America | -81   | 34.1 | — |
| United States of America | -97.5 | 30.2 | — |
| United States of America | -97.7 | 32.8 | — |
| United States of America | -97.3 | 32.9 | — |
| United States of America | -97   | 32.3 | — |
| United States of America | -97.1 | 33.1 | — |
| United States of America | -87.6 | 33   | — |
| United States of America | -95.4 | 36.3 | — |
| United States of America | -96.8 | 33.9 | — |
| United States of America | -98.1 | 30.3 | — |
| United States of America | -95.3 | 39   | — |
| United States of America | -97.8 | 30.1 | — |
| United States of America | -98.8 | 37.1 | — |

---

|                                             |                                    |           |          |            |
|---------------------------------------------|------------------------------------|-----------|----------|------------|
|                                             | United States of America           | -98.9     | 31.6     | —          |
|                                             | United States of America           | -99.4     | 37.3     | —          |
|                                             | United States of America           | -96.2     | 39.6     | —          |
|                                             | United States of America           | -95.2     | 38.8     | —          |
|                                             | United States of America           | -95       | 38.8     | —          |
|                                             | United States of America           | -96.6     | 39.3     | —          |
|                                             | United States of America           | -94.8     | 37.4     | —          |
|                                             | United States of America           | -99.5     | 39.4     | —          |
|                                             | United States of America           | -94.8     | 37.4     | —          |
|                                             | United States of America           | -95.4     | 39.2     | —          |
|                                             | United States of America           | -95.5     | 37.3     | —          |
|                                             | United States of America           | -99.3     | 37.4     | —          |
|                                             | United States of America           | -97.3     | 37.5     | —          |
|                                             | United States of America           | -95.5     | 38.9     | —          |
|                                             | United States of America           | -96.3     | 29.9     | —          |
|                                             | United States of America           | -83.9     | 39.7     | —          |
|                                             | United States of America           | -82.5     | 39.5     | —          |
|                                             | United States of America           | -83.8     | 39.8     | —          |
| <b><i>Osphya obscura</i> Pic, 1937</b>      | Mexico.                            | -92.51243 | 16.06642 | Pic (1937) |
| <b><i>Osphya pallida</i> Champion, 1889</b> | Guatemala: Cerro Zunil, Pantaleon. | -91.49607 | 14.77672 | Champion   |



|                                               |                                               |           |          |            |  |        |
|-----------------------------------------------|-----------------------------------------------|-----------|----------|------------|--|--------|
|                                               |                                               |           |          |            |  | (1889) |
| <i>Osphya tuberculiventris</i> Champion, 1889 | Guatemala: San Gerónimo                       | -90.24215 | 15.06085 | —          |  |        |
| <i>Osphya sinensis</i> sp.                    | China: Hubei, Shennongjia, Dajiuhu, Luoyanghe | 110.13778 | 31.57722 | This study |  |        |
|                                               | China: Hubei, Shennongjia, Dajiuhu, Dongxi    | 110.12194 | 31.53944 | —          |  |        |

**Table S2.** Twenty environmental variables in building the initial MaxEnt model

| Class                 | Variables | Description                                                | Unit |
|-----------------------|-----------|------------------------------------------------------------|------|
| Bioclimatic variables | BIO1      | Annual Mean Temperature                                    | °C   |
|                       | BIO2      | Mean Diurnal Range (Mean of monthly (max temp - min temp)) | -    |
|                       | BIO3      | Isothermality (BIO2/BIO7) (×100)                           | °C   |
|                       | BIO4      | Temperature Seasonality (standard deviation ×100)          | °C   |
|                       | BIO5      | Max Temperature of Warmest Month                           | °C   |
|                       | BIO6      | Min Temperature of Coldest Month                           | °C   |
|                       | BIO7      | Temperature Annual Range (BIO5-BIO6)                       | °C   |
|                       | BIO8      | Mean Temperature of Wettest Quarter                        | °C   |
|                       | BIO9      | Mean Temperature of Driest Quarter                         | °C   |
|                       | BIO10     | Mean Temperature of Warmest Quarter                        | °C   |
|                       | BIO11     | Mean Temperature of Coldest Quarter                        | °C   |
|                       | BIO12     | Annual Precipitation                                       | mm   |

|                       |       |                                                      |    |
|-----------------------|-------|------------------------------------------------------|----|
|                       | BIO13 | Precipitation of Wettest Month                       | mm |
|                       | BIO14 | Precipitation of Driest Month                        | mm |
|                       | BIO15 | Precipitation Seasonality (Coefficient of Variation) | 1  |
|                       | BIO16 | Precipitation of Wettest Quarter                     | mm |
|                       | BIO17 | Precipitation of Driest Quarter                      | mm |
|                       | BIO18 | Precipitation of Warmest Quarter                     | mm |
|                       | BIO19 | Precipitation of Coldest Quarter                     | mm |
| Topographic variables | ALT   | The Elevation                                        | m  |

**Table S3.** Multicollinearity test of Pearson correlation analysis for the informative environmental variables

|        | bio_1   | bio_2   | bio_3   | bio_4   | bio_8   | bio_9   | bio_12 | bio_15  | bio_17 | bio_19 | ALT |
|--------|---------|---------|---------|---------|---------|---------|--------|---------|--------|--------|-----|
| bio_1  | 1       |         |         |         |         |         |        |         |        |        |     |
| bio_2  | .573**  | 1       |         |         |         |         |        |         |        |        |     |
| bio_3  | .623**  | .585**  | 1       |         |         |         |        |         |        |        |     |
| bio_4  | -.171** | .225**  | -.630** | 1       |         |         |        |         |        |        |     |
| bio_8  | .522**  | .203**  | -.023   | .335**  | 1       |         |        |         |        |        |     |
| bio_9  | .563**  | .399**  | .688**  | -.523** | -.291** | 1       |        |         |        |        |     |
| bio_12 | .099    | -.218** | .021    | -.162** | .138*   | -.038   | 1      |         |        |        |     |
| bio_15 | .548**  | .528**  | .702**  | -.315** | .064    | .550**  | .082   | 1       |        |        |     |
| bio_17 | -.446** | -.445** | -.508** | .156**  | -.116   | -.409** | .404** | -.769** | 1      |        |     |
| bio_19 | .000    | .023    | .201**  | -.279** | -.519** | .471**  | .252** | .210**  | .130*  | 1      |     |

|     |         |      |      |        |         |       |        |        |        |        |   |
|-----|---------|------|------|--------|---------|-------|--------|--------|--------|--------|---|
| ALT | -.347** | .025 | .098 | -.152* | -.501** | .136* | .388** | .203** | .179** | .329** | 1 |
|-----|---------|------|------|--------|---------|-------|--------|--------|--------|--------|---|

Note: \*\*means significant correlation at 0.01 level (bilateral). \*means significant correlation at 0.05 level (bilateral).

**Table S4.** The performance of MaxEnt models under different climate scenarios.

|     | LGM   | MID   | Current | 2050s RCP4.5 | 2050s RCP8.5 | 2070s RCP4.5 | 2070s RCP8.5 |
|-----|-------|-------|---------|--------------|--------------|--------------|--------------|
| AUC | 0.966 | 0.967 | 0.967   | 0.969        | 0.966        | 0.966        | 0.968        |
| TSS | 0.872 | 0.941 | 0.899   | 0.876        | 0.868        | 0.868        | 0.869        |

**Table S5.** The potential distribution area of *Osphya* under different climate scenarios (Units 10<sup>4</sup> Km<sup>2</sup>).

| Habitat suitability | LGM    | MID     | Current | 2050s RCP4.5 | 2050s RCP8.5 | 2070s RCP4.5 | 2070s RCP8.5 |
|---------------------|--------|---------|---------|--------------|--------------|--------------|--------------|
| Suitable (0.2-1.0)  | 645.98 | 1015.18 | 1049.21 | 1051.73      | 1257.49      | 1163.56      | 1196.31      |
| Low (0.2-0.4)       | 491.28 | 830.60  | 850.74  | 880.69       | 1018.02      | 954.08       | 981.43       |
| General (0.4-0.6)   | 110.96 | 161.92  | 164.82  | 155.24       | 214.59       | 187.89       | 195.09       |
| Medium (0.6-0.8)    | 39.17  | 22.25   | 31.32   | 14.58        | 22.71        | 20.11        | 17.79        |
| High (0.8-1.0)      | 4.56   | 0.42    | 2.33    | 1.22         | 2.18         | 1.48         | 2.00         |

**Table S6.** Distribution changes of *Osphya* under the different climate scenarios (units in Km<sup>2</sup>). The percentage of the potential area compared to the total study area is shown in brackets.

| Dynamic changes   | LGM                      | MID                      | 2050s RCP4.5             | 2050s RCP8.5             | 2070s RCP4.5             | 2070s RCP8.5             |
|-------------------|--------------------------|--------------------------|--------------------------|--------------------------|--------------------------|--------------------------|
| Range expansion   | 4953614.34<br>(3.63%)    | 1932449.41<br>(1.42%)    | 1520277.75<br>(1.12%)    | 3044638.52<br>(2.23%)    | 2255237.95<br>(1.65%)    | 2965088.30<br>(2.18%)    |
| No occupancy      | 125024390.66<br>(91.68%) | 124279979.85<br>(91.14%) | 124352006.29<br>(91.19%) | 122827645.51<br>(90.07%) | 123617046.08<br>(90.65%) | 122907195.73<br>(90.13%) |
| No change         | 5540071.64<br>(4.06%)    | 8561267.15<br>(6.28%)    | 8992110.64<br>(6.59%)    | 9528103.55<br>(6.99%)    | 9381756.84<br>(6.88%)    | 8991927.13<br>(6.59%)    |
| Range contraction | 845691.29<br>(0.63%)     | 1592304.18<br>(1.16%)    | 1501605.92<br>(1.10%)    | 965613.02<br>(0.71%)     | 1111959.72<br>(0.82%)    | 1501789.43<br>(1.10%)    |

**Table S7.** Percent contribution and permutation importance of environmental variables in building MaxEnt model

| Class                 | Variables | Description                                                | Unit | Percent contribution | Permutation importance |
|-----------------------|-----------|------------------------------------------------------------|------|----------------------|------------------------|
| Bioclimatic variables | bio_1     | Annual Mean Temperature                                    | °C   | 19.3                 | 22.1                   |
|                       | bio_2     | Mean Diurnal Range (Mean of monthly (max temp - min temp)) | °C   | 1.9                  | 1.4                    |
|                       | bio_3     | Isothermality (BIO2/BIO7) (×100)                           | -    | 16.3                 | 9.5                    |
|                       | bio_4     | Temperature Seasonality (standard deviation ×100)          | °C   | 14                   | 18.6                   |
|                       | bio_8     | Mean Temperature of Wettest Quarter                        | °C   | 1                    | 9.5                    |
|                       | bio_9     | Mean Temperature of Driest Quarter                         | °C   | 1.9                  | 3.5                    |
|                       | bio_12    | Annual Precipitation                                       | mm   | 6.4                  | 14.8                   |
|                       | bio_15    | Precipitation Seasonality (Coefficient of Variation)       | 1    | 1.5                  | 6.4                    |
|                       | bio_17    | Precipitation of Driest Quarter                            | mm   | 3.6                  | 3.3                    |
|                       | bio_19    | Precipitation of Coldest Quarter                           | mm   | 32.6                 | 9.1                    |
| Topographic variables | ALT       | The Elevation                                              | m    | 1.2                  | 1.8                    |

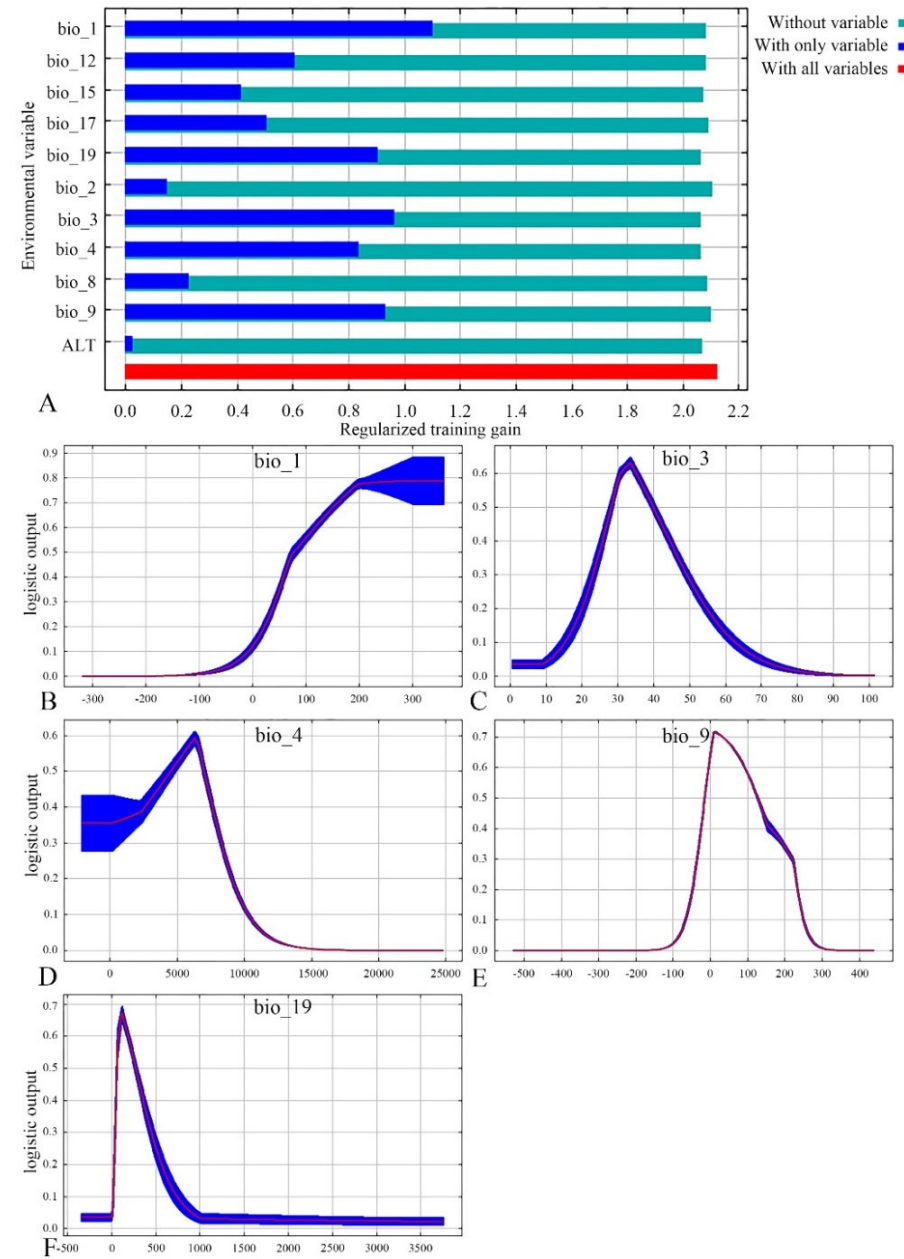

**Figure S1.** (A) The results of Jackknife of regularized training gain for *Osphya*; (B–F) response curves of the five most important environmental variables affecting distribution of *Osphya*: (B) annual mean temperature; (C) isothermality; (D) temperature seasonality; (E) mean temperature of driest quarter; (F) precipitation of coldest quarter. Blue margins represent  $\pm$  SD calculated over 10 replicates.
